# Supplementary material for: Ionic liquid effects on Mizoroki–Heck reactions: more than just carbene complex formation
Source: Royal Society of Chemistry journal article supplement (doi:10.1039/c1cc12082d), 2011-01-01

## Electronic supporting information for

### “Ionic liquids effects on Mizoroki-Heck reactions: More than just carbene complex formation”

Matthew R. Gyton,<sup>a</sup> Marcus L. Cole,<sup>a,\*</sup> and Jason B. Harper<sup>a,\*</sup>

<sup>a</sup>*School of Chemistry, University of New South Wales, Sydney, NSW, 2052, Australia.*

#### Synthesis of [Bmim][NTf<sub>2</sub>]-d<sub>3</sub>

Prepared following the procedure of Dupont<sup>1</sup> with modification. All of the following operations were conducted under an argon atmosphere. Sodium metal (944 mg, 41.1 mmol) was added to D<sub>2</sub>O (30 cm<sup>3</sup>) with stirring. The resulting solution was transferred by cannula to a Schlenk flask containing [bmim]Cl (30.03 g, 171.9 mmol) and stirred for 48 hours under argon. The yellow solution was then neutralised with a solution of DCl (35% in D<sub>2</sub>O) and the volatiles removed *in vacuo*. The oily residue was redissolved in CH<sub>2</sub>Cl<sub>2</sub> (100 cm<sup>3</sup>), filtered and the volatiles again removed *in vacuo*. The resulting solid was again treated with a fresh solution of sodium (95 mg, 4.1 mmol) in D<sub>2</sub>O (20 cm<sup>3</sup>) and stirred for a further 48 hours before neutralisation with DCl (35% in D<sub>2</sub>O). Volatiles were again removed *in vacuo*, the crude product redissolved CH<sub>2</sub>Cl<sub>2</sub> (100 cm<sup>3</sup>), filtered and the solvent removed and redissolved in D<sub>2</sub>O (10 cm<sup>3</sup>). To this was added a solution of Li[NTf<sub>2</sub>] (g, mmol) in D<sub>2</sub>O (10 cm<sup>3</sup>). After stirring for three hours, the reaction mixture was diluted with CH<sub>2</sub>Cl<sub>2</sub> (200 cm<sup>3</sup>) and the lower layer removed by decanting. The organic phase was washed with water (5 x 150 cm<sup>3</sup>), dried over MgSO<sub>4</sub> and volatiles removed *in vacuo* to afford [bmim][N(CF<sub>3</sub>SO<sub>2</sub>)<sub>2</sub>]-d<sub>3</sub> as a pale yellow highly viscous liquid. (39.22 g, 93.52 mmol, 54%) <sup>1</sup>H NMR (500.13 MHz, (CD<sub>3</sub>)<sub>2</sub>SO) δ 0.90 (t, <sup>3</sup>J<sub>HH</sub> = 7.4 Hz, 3H, NCH<sub>2</sub>CH<sub>2</sub>CH<sub>2</sub>CH<sub>3</sub>), 1.25 (m, 2H, NCH<sub>2</sub>CH<sub>2</sub>CH<sub>2</sub>CH<sub>3</sub>), 1.76 (m, 2H, NCH<sub>2</sub>CH<sub>2</sub>CH<sub>2</sub>CH<sub>3</sub>), 3.86 (s, 3H, CH<sub>3</sub>N), 4.18 (t, <sup>3</sup>J<sub>HH</sub> = 7.3 Hz, 2H, NCH<sub>2</sub>CH<sub>2</sub>CH<sub>2</sub>CH<sub>3</sub>), 7.74 (s, 1H, NCHCHN, 99% D), 7.81 (s, 1H, NCHCHN, 99% D), 9.34 (s, 1H, NCHN, 95% D).

#### Kinetic Data

The following charts display the extent of consumption of butyl acrylate as well as the rate of formation of the cinnamate product, as measured using <sup>1</sup>H NMR Spectroscopy. Each data point is the average of data points for that particular point in time. Each average was determined from two or three independent iterations of a particular experiment. The error bars displayed represent the 95% confidence interval calculated using the inverse of the Student's t-distribution and are presented for the experiments with three iterations. For experiments where only duplicates were performed, a 95% confidence interval is meaningless - in such cases the data are displayed as the average of conducted experiments and it is noted that the range in such cases is *ca.* 10%. Control experiments conducted in the absence of a palladium pre-catalyst displayed no observable cinnamate formation.

---

<sup>1</sup>J. D. Scholten, G. Ebeling and J. Dupont, *Dalton Trans.* 2007, 5554-5560.

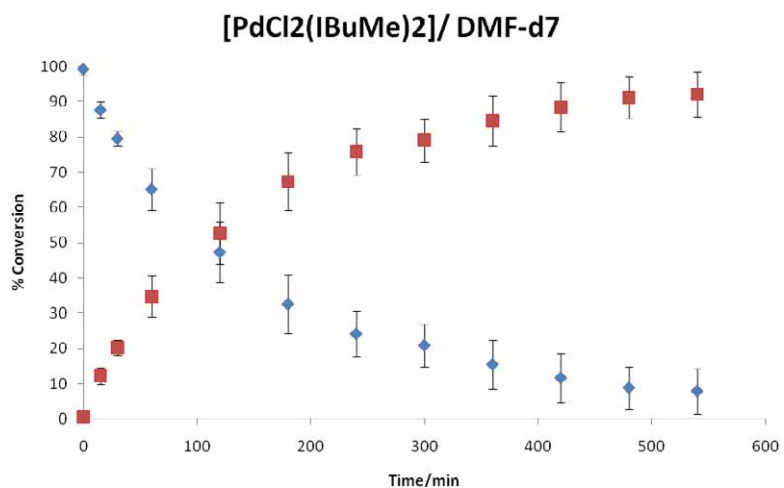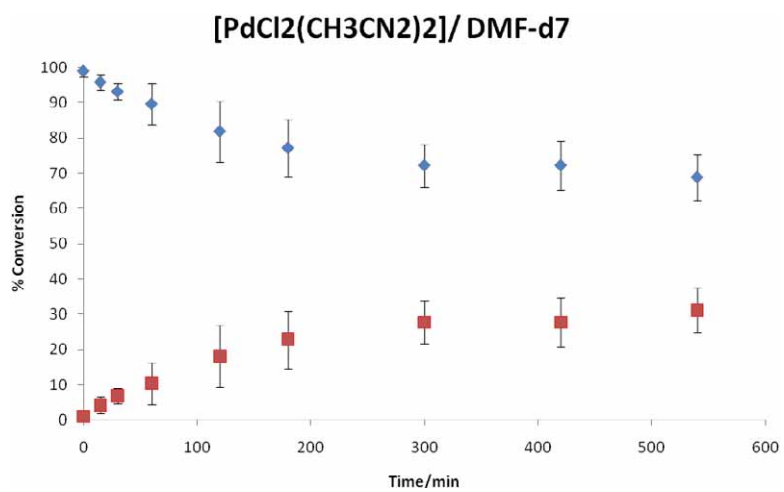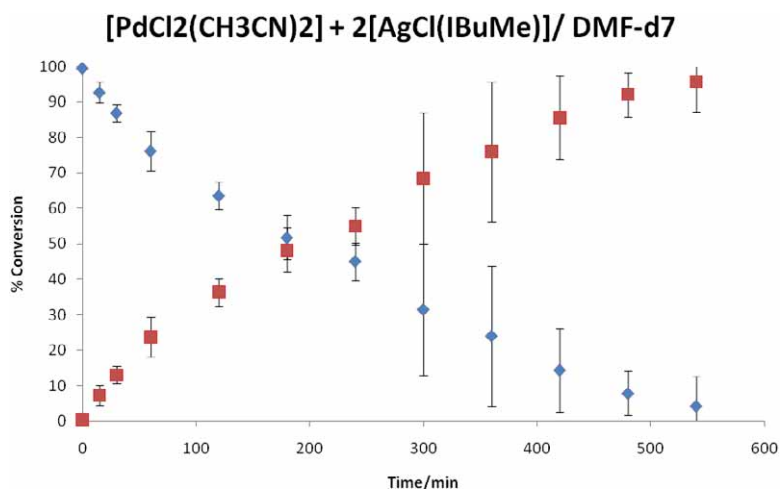

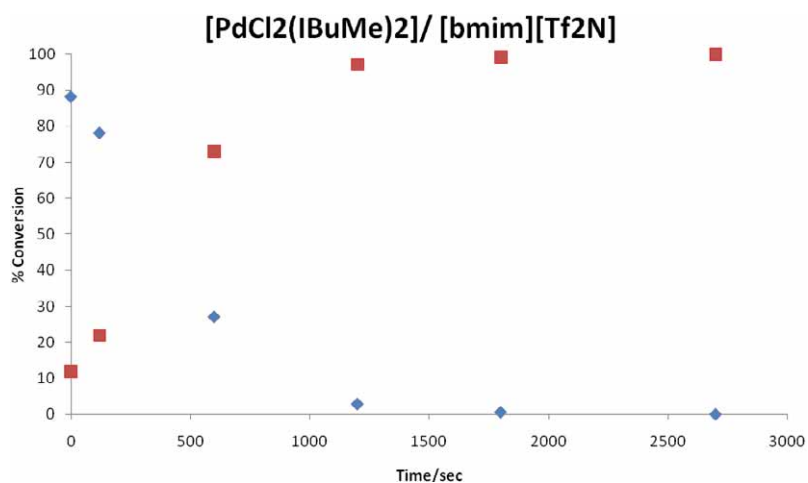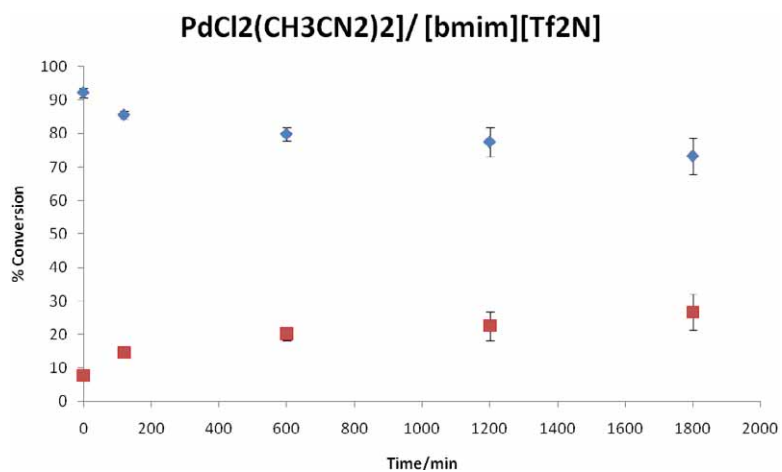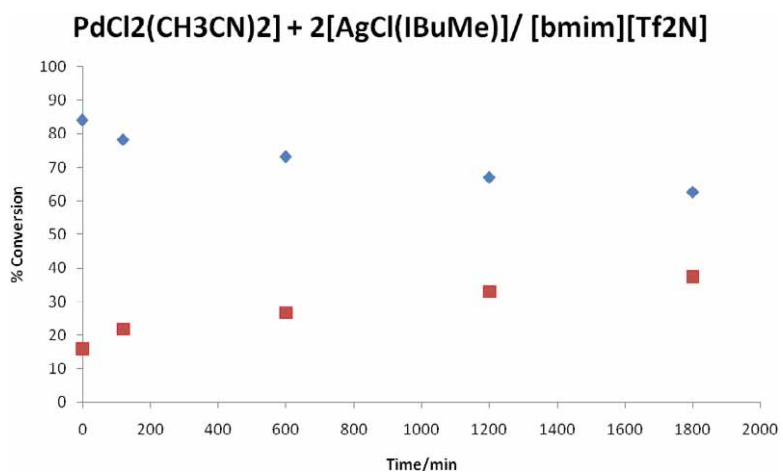

Supplement: c1cc12082d.pdf [file c1cc12082d.pdf]
